# Supplementary material
Source: PubMed Central journal article supplement (PMC3278313)
Supplement: supp_bhr057_Mao_et_al_Supplemental_Fig_1a.pdf [file supp_bhr057_Mao_et_al_Supplemental_Fig_1a.pdf]

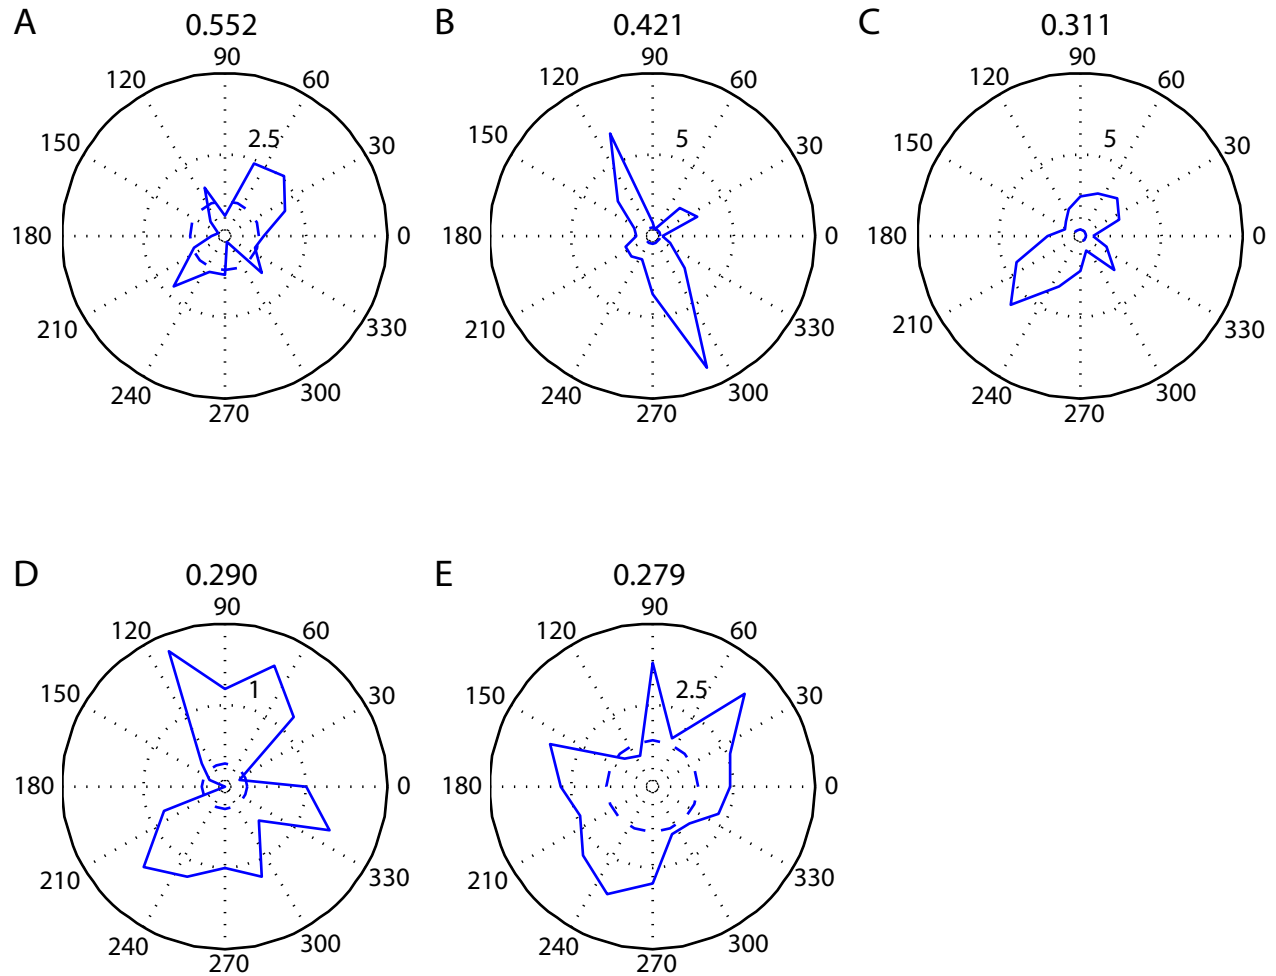

Supplemental Figure 1a. Tuning curves of late responses from individual *Dlx1*<sup>+/+</sup> cells (A-E) from the top 20th percentile of *Dlx1*<sup>+/+</sup> OSI distribution. The OSI for each cell is labeled on top of the tuning curve. Solid lines: firing rates as responses to the different orientations (in degrees); dash lines: spontaneous firing rates.
