# Supplementary material
Source: PubMed Central journal article supplement (PMC3278313)
Supplement: supp_bhr057_Mao_et_al_Supplemental_Fig_1b.pdf [file supp_bhr057_Mao_et_al_Supplemental_Fig_1b.pdf]

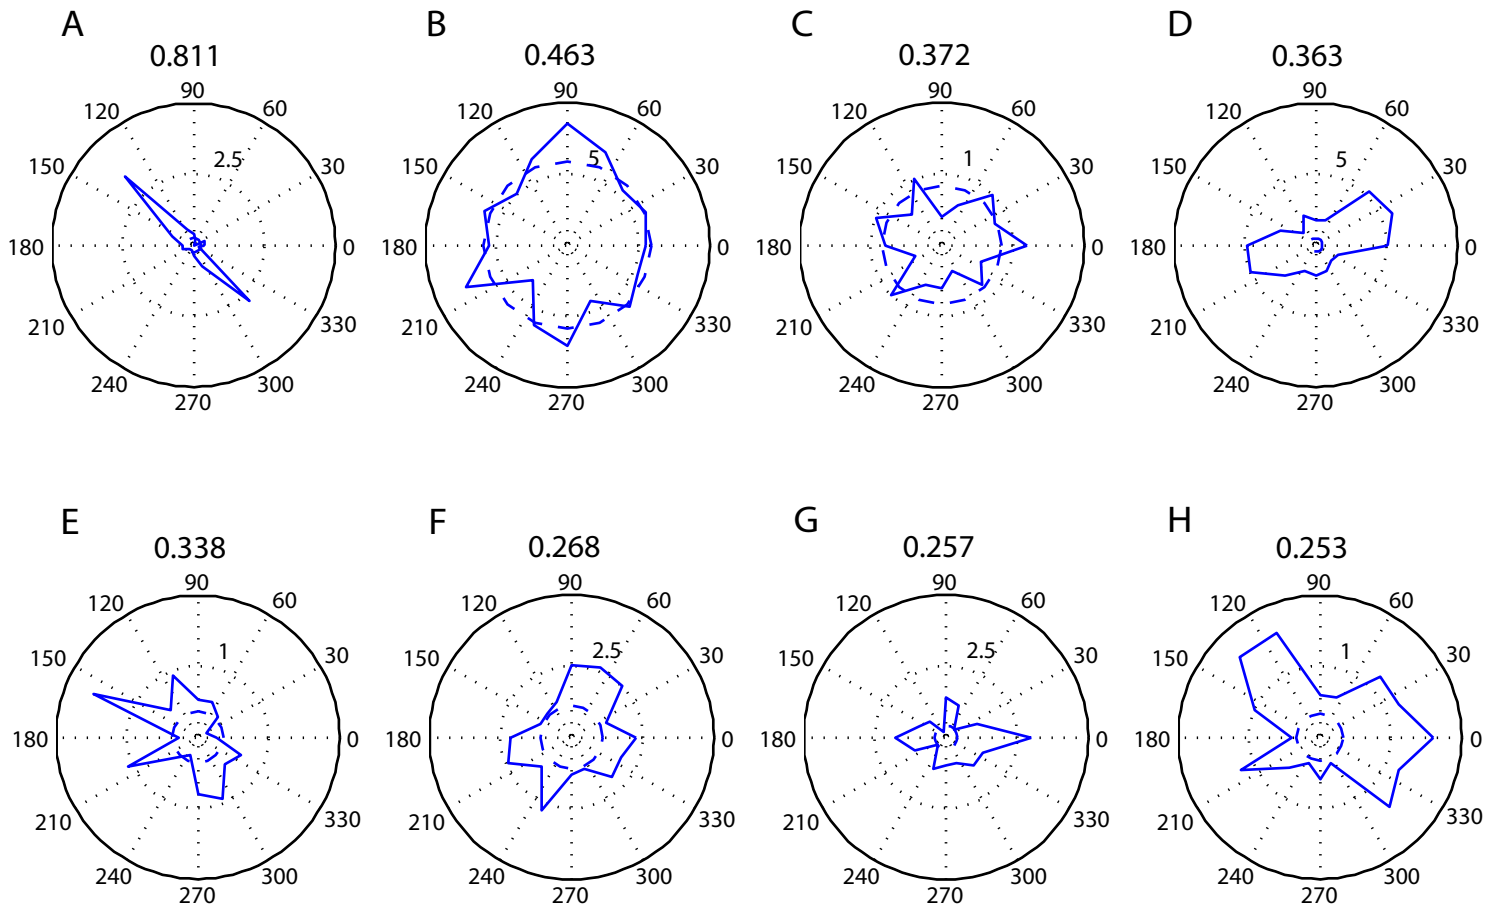

Supplemental Figure 1b. Tuning curves of late responses from individual *Dlx1*<sup>-/-</sup> cells (A-H) from the top 20th percentile of *Dlx1*<sup>-/-</sup> OSI distribution. The OSI for each cell is labeled on top of the tuning curve (spanning 360 degrees). Solid lines: firing rates as responses to the different orientations (in degrees); dash lines: spontaneous firing rates. Numbers outside the solid circles indicate orientation (degrees); numbers next to the dotted circles indicate the scale for firing rates (Hz).
