# Supplementary material
Source: PubMed Central journal article supplement (PMC3278313)
Supplement: supp_bhr057_Mao_et_al_Supplemental_Fig_2.pdf [file supp_bhr057_Mao_et_al_Supplemental_Fig_2.pdf]

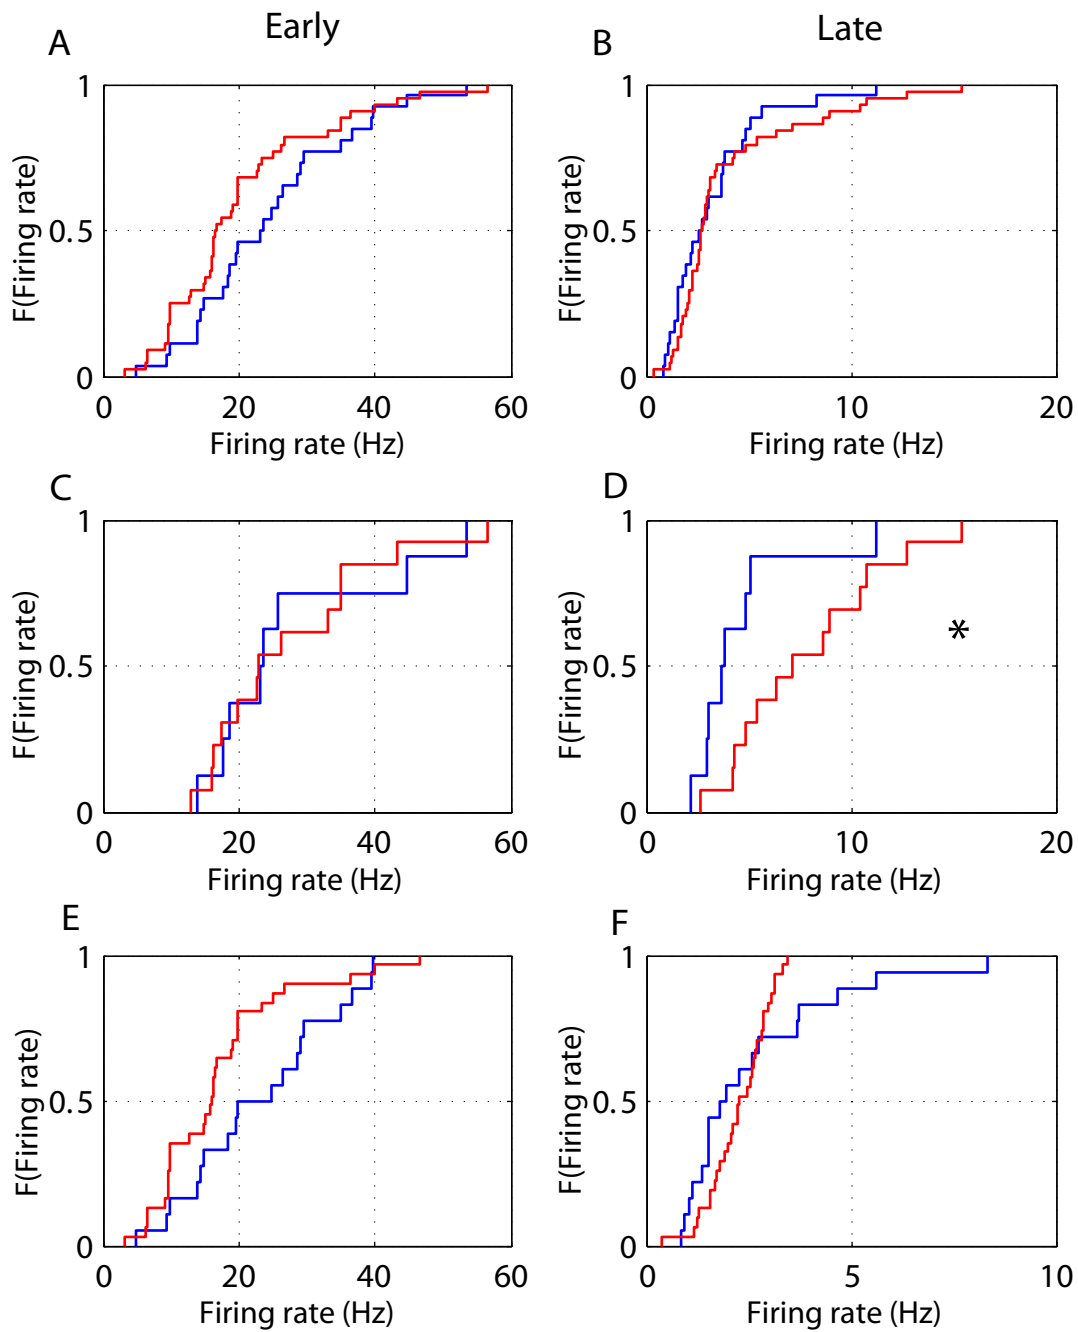

Supplemental Figure 2. CDFs for peak evoked firing rates for the entire cell population (A-B), for the top 30% of cells with the highest firing rates (C-D), and for the bottom 70% of cells with the lowest firing rates (E-F). All the left panels are based on early response (A, C, E); all the right panels are based on late response (B, D, F). Blue: Dlx1<sup>+/+</sup>; red: Dlx1<sup>-/-</sup>; \*:  $p < 0.05$ .
