# Supplementary material
Source: PubMed Central journal article supplement (PMC3278313)
Supplement: supp_bhr057_Mao_et_al_Supplemental_Fig_3.pdf [file supp_bhr057_Mao_et_al_Supplemental_Fig_3.pdf]

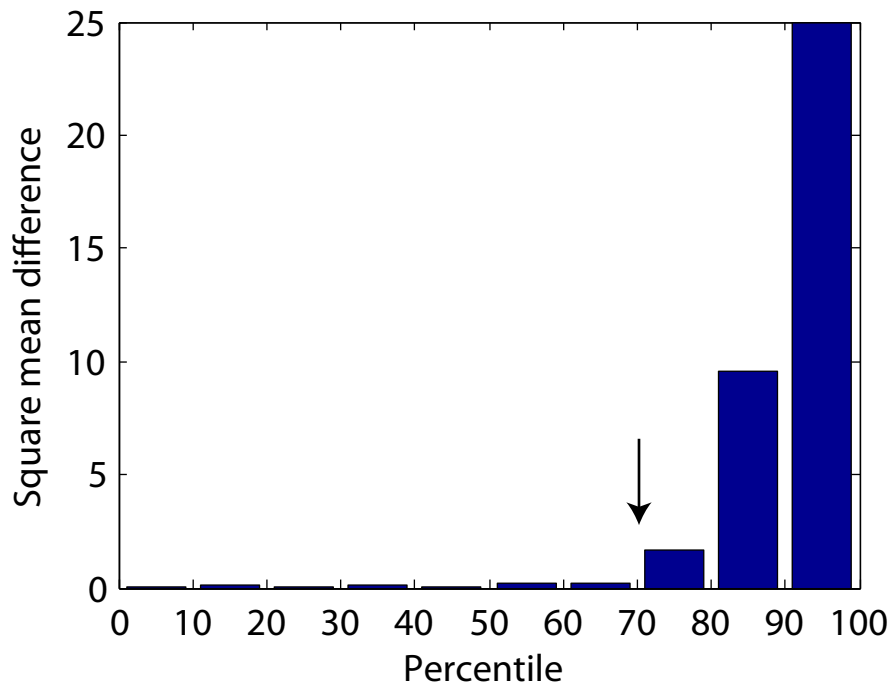

Supplemental Figure 3. Histograms of the square of mean differences between evoked firing rates during late responses of Dlx1<sup>+/+</sup> and Dlx1<sup>-/-</sup> cells, binned by percentile. The histogram indicated a clear divergence point in the distribution at the top 30 percentile of all cells. The arrow shows the location of this divergence point. Each bin represents 10% of the total population.
