# Supplementary material
Source: PubMed Central journal article supplement (PMC3278313)
Supplement: supp_bhr057_Mao_et_al_Supplemental_Fig_4.pdf [file supp_bhr057_Mao_et_al_Supplemental_Fig_4.pdf]

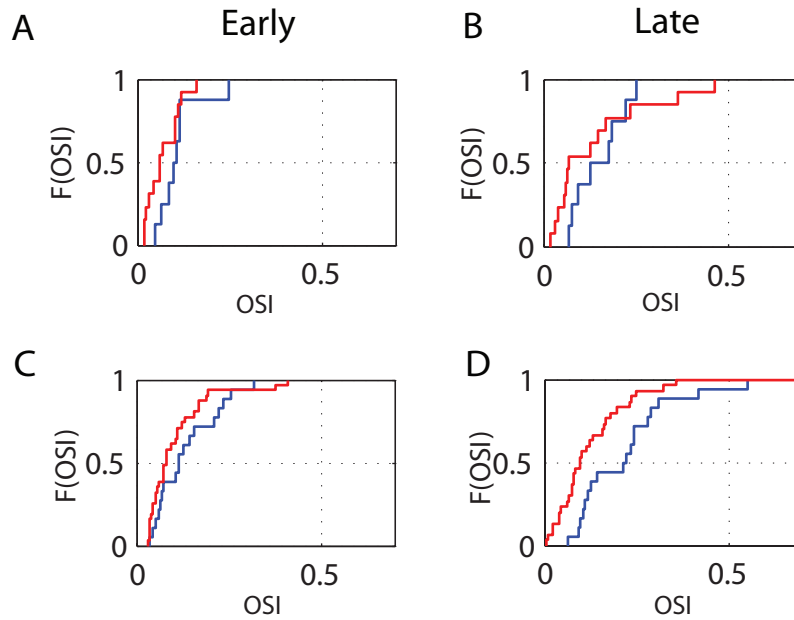

Supplemental Figure 4. CDFs for OSIs for the top 30% of cells with the highest firing rates (A-B) and for the bottom 70% of cells with the lowest firing rates (C-D). The left panels are based on early response (A, C); all the right panels are based on late response (B, D).  $p > 0.05$  for comparisons of the top 30% cells (A-B);  $p = 0.09$  for comparisons of the bottom 70% cells (C-D), suggesting a trend toward lower OSIs in *Dlx1*<sup>-/-</sup> cells. Blue: *Dlx1*<sup>+/+</sup>; red: *Dlx1*<sup>-/-</sup>.
