# Supplementary material
Source: PubMed Central journal article supplement (PMC3278313)
Supplement: supp_bhr057_Mao_et_al_Supplemental_Fig_5.pdf [file supp_bhr057_Mao_et_al_Supplemental_Fig_5.pdf]

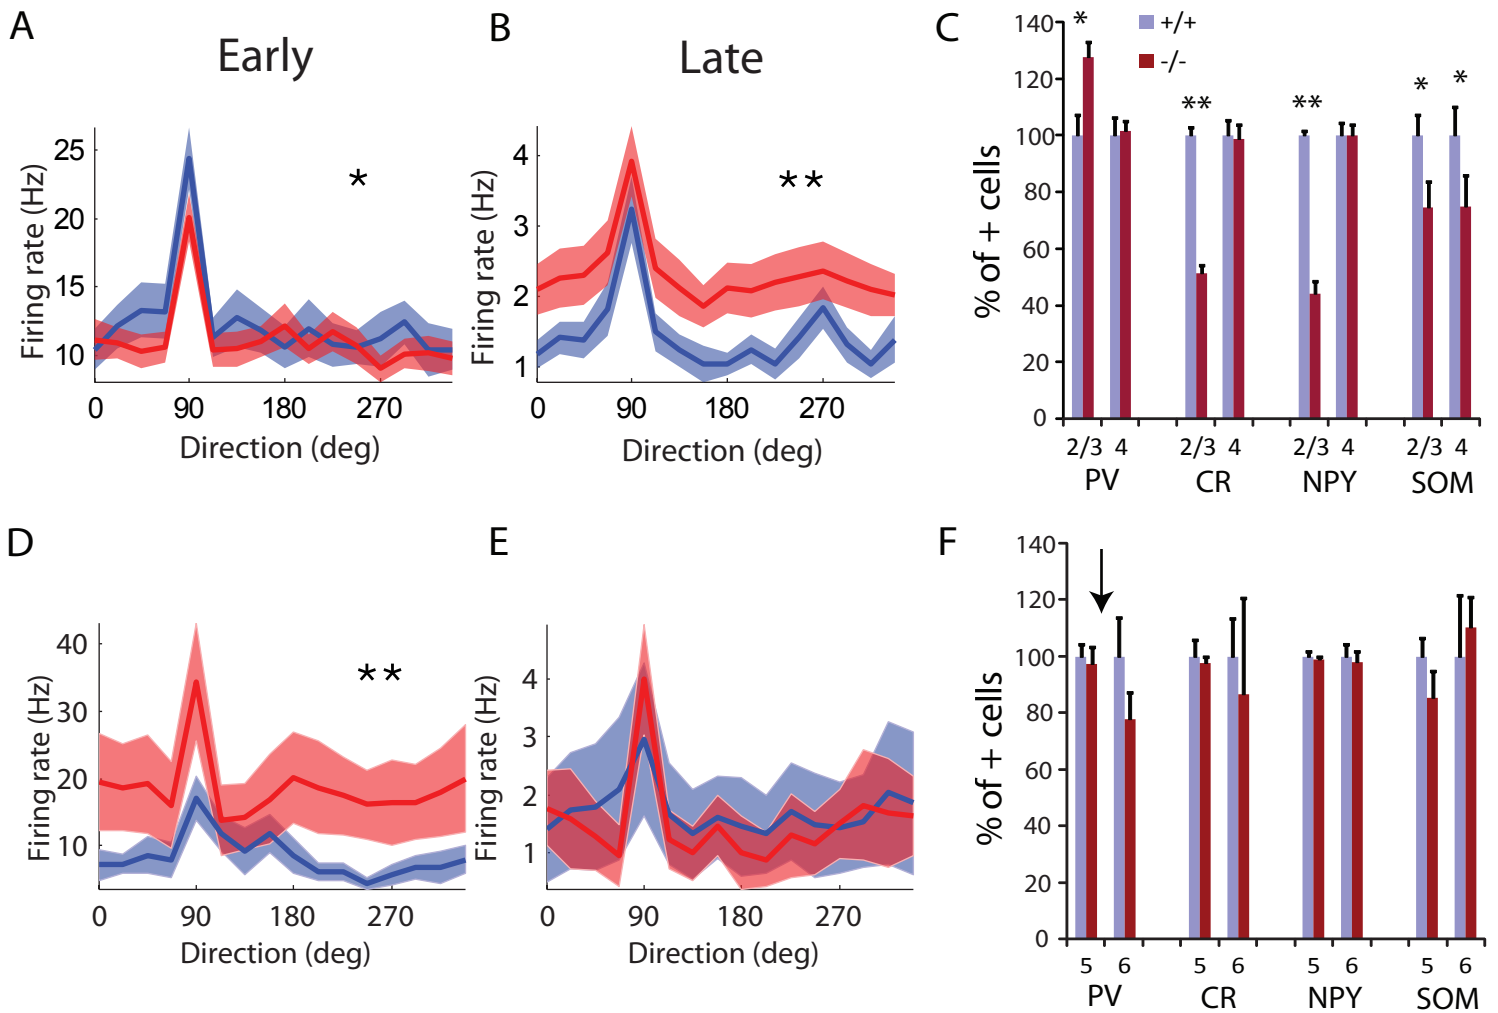

Supplemental Figure 5. In contrast to *Dlx1*<sup>-/-</sup> cells in layers 2-4 (panels A-B), those in layers 5-6 showed altered average tuning curves based on early (panel D) but not late responses (panel E). Consistent with this, our histological analysis showed that in layers 2-4 of the *Dlx1* mutant mice (panel C), calretinin<sup>+</sup>, NPY<sup>+</sup>, and somatostatin<sup>+</sup> cells are reduced, but parvalbumin<sup>+</sup> cells are increased, while in layers 5-6 (panel F), calretinin<sup>+</sup>, NPY<sup>+</sup>, and somatostatin<sup>+</sup> cells appeared unchanged (given that the total number of parvalbumin<sup>+</sup> cells are unchanged but there is an increase in layers 2-4, the number of parvalbumin<sup>+</sup> cells may be slightly decreased in layers 5-6, as indicated by the arrow, although  $p > 0.05$  for these comparisons). For all comparisons, \*:  $p < 0.05$ ; \*\*:  $p < 0.01$ . PV: parvalbumin<sup>+</sup>; CR: calretinin<sup>+</sup>; NPY: NPY<sup>+</sup>; SOM: somatostatin<sup>+</sup>.
